# Supplementary material
Source: PubMed Central journal article supplement (PMC6570589)
Supplement: NIHMS1516734-supplement-1.pdf [file NIHMS1516734-supplement-1.pdf]

1 **Validation of an HCC Early detection Screening (HES) algorithm in a multi-etiology Veteran's**

2 **Affairs cirrhosis cohort**

3 **Additional supplementary materials**

4 **Supplementary Figure 1:** Derivation of the study cohort in the Department of Veteran’s Affairs (VA)  
5 Corporate Database Warehouse.

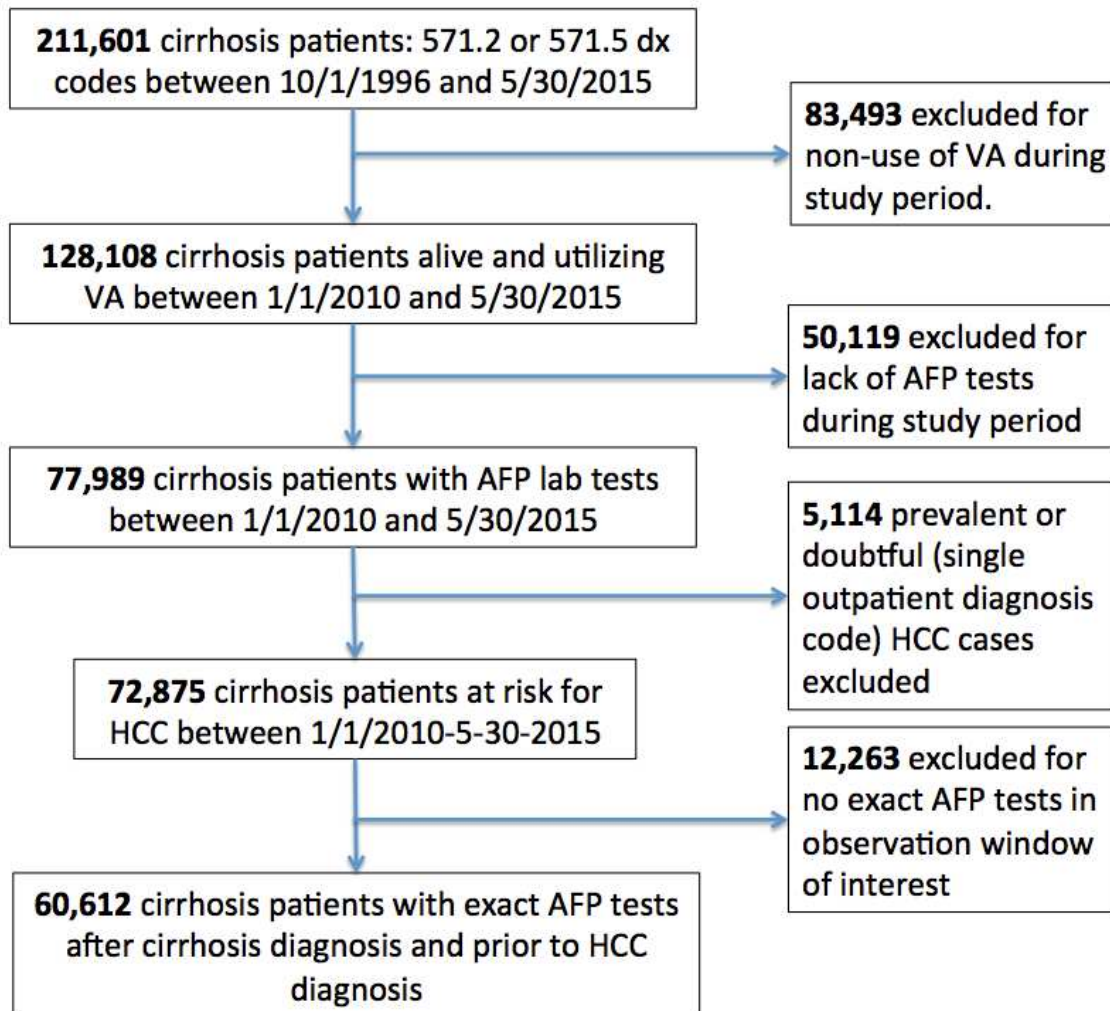

6  
7  
8  
9  
10

11 **Supplementary Figure 2:** HCC classification procedure in the Department of Veteran's Affairs (VA)  
 12 cirrhosis cohort.

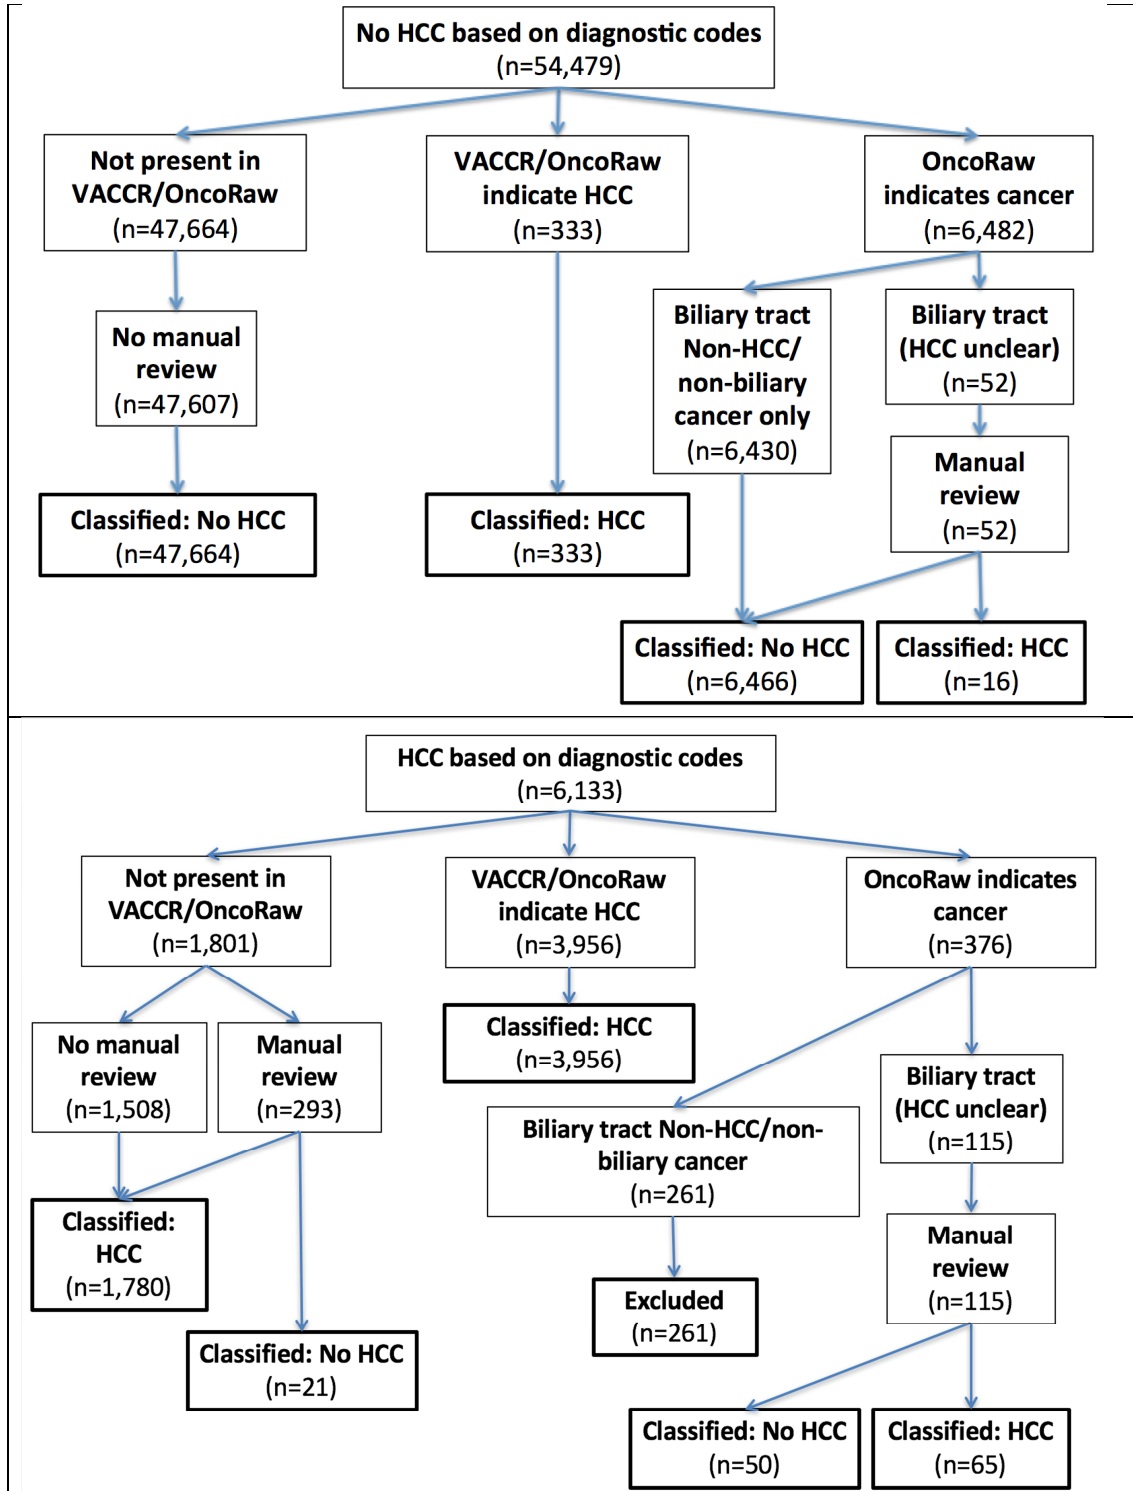

13 \* VACCR: VA Central Cancer Registry; OncoRaw: VA Corporate Database Warehouse oncology raw data  
 14 files.

15 **Supplementary Table 1: Demographic table**

|                                    | <b>Controls</b>     | <b>HCC cases</b>    |
|------------------------------------|---------------------|---------------------|
| <b>N</b>                           | 33,627              | 4,804               |
| <b>Age at baseline AFP (years)</b> | 60.67 (56.18-64.44) | 60.83 (57.22-64.49) |
| <b>Sex</b>                         |                     |                     |
| Male                               | 32,575 (96.87%)     | 4,743 (98.73%)      |
| Female                             | 1,052 (3.13%)       | 61 (1.27%)          |
| <b>Race</b>                        |                     |                     |
| Non-Hispanic White                 | 21,215 (63.09%)     | 2,955 (61.51%)      |
| Non-Hispanic Black                 | 6,705 (19.94%)      | 934 (19.44%)        |
| Hispanic                           | 3,210 (9.55%)       | 578 (12.03%)        |
| Other                              | 2,497 (7.43%)       | 337 (7.01%)         |
| <b>Number of AFP tests</b>         |                     |                     |
| 1                                  | 13,528 (40.23%)     | 1,801 (37.49%)      |
| 2                                  | 7,265 (21.60%)      | 932 (19.40%)        |
| 3-4                                | 7,677 (22.83%)      | 1,173 (24.42%)      |
| >4                                 | 5,157 (15.34%)      | 898 (18.69%)        |
| <b>Months between AFP tests</b>    | 6.21 (3.71-11.40)   | 5.29 (2.76-8.97)    |
| <b>Baseline AFP (ng/ml)</b>        | 4.40 (2.80-7.97)    | 11.01 (5.20-37.23)  |
| <b>Baseline ALT (ng/ml)</b>        | 40 (25-70)          | 56 (34-90)          |
| <b>Baseline PLT (1000's)</b>       | 131 (89-183)        | 99 (70-138)         |
| <b>Etiology of cirrhosis</b>       |                     |                     |
| Alcoholic liver disease            | 24,137 (71.78%)     | 3,737 (77.79%)      |
| Hepatitis C virus                  | 16,264 (48.37%)     | 3,392 (70.61%)      |
| Hepatitis B virus                  | 2,962 (8.81%)       | 437 (9.10%)         |
| Nonalcoholic fatty liver disease   | 5,636 (16.76%)      | 584 (12.16%)        |

16 \* Continuous variables: median and interquartile range (25<sup>th</sup> and 75<sup>th</sup> percentiles)

17 \* Categorical variables: number and percentage

18 **Definitions of time-dependent patient-level sensitivity and screening-level false positive rate**

19 **Measure/Biomarker used in screening:** the predicted probability of HCC in the next six months from  
 20 current AFP test.

21 **Positive tests:** if the predicted probability of HCC in the next six months exceeds a threshold  $c$ .

22 **Sensitivity within T months corresponding to 10% screening level false positive rate:** the proportion of  
 23 HCC cases with  $\geq 1$  positive tests within T months prior to their HCC diagnosis, among all the HCC cases  
 24 with at least one AFP test within T months of their HCC diagnosis. The threshold  $c$  is selected to ensure a  
 25 10% screening level false positive rate (T months).

26 **Screening level false positive test (T months):** the proportion of positive tests among all tests done in  
 27 either controls with no HCC or in cases when testing occurs more than 6 months prior to HCC diagnosis.

28 **Sensitivity between T1 and T2 months corresponding to 10% screening level false positive rate:** the  
 29 proportion of HCC cases with  $\geq 1$  positive tests within T1-T2 months prior to their HCC diagnosis among  
 30 all the HCC cases with at least one AFP test during this period. The threshold  $c$  is selected to ensure a  
 31 10% screening level false positive rate (T2 months).

32 **Supplementary Figure 3:** Visual illustration of periods during which a positive screening result was  
 33 considered to be a true positive screen and periods where a positive screen result was considered to be  
 34 a false positive screen in HCC cases for different time-dependent definitions of patient-level sensitivity  
 35 and screening-level false positive rate.

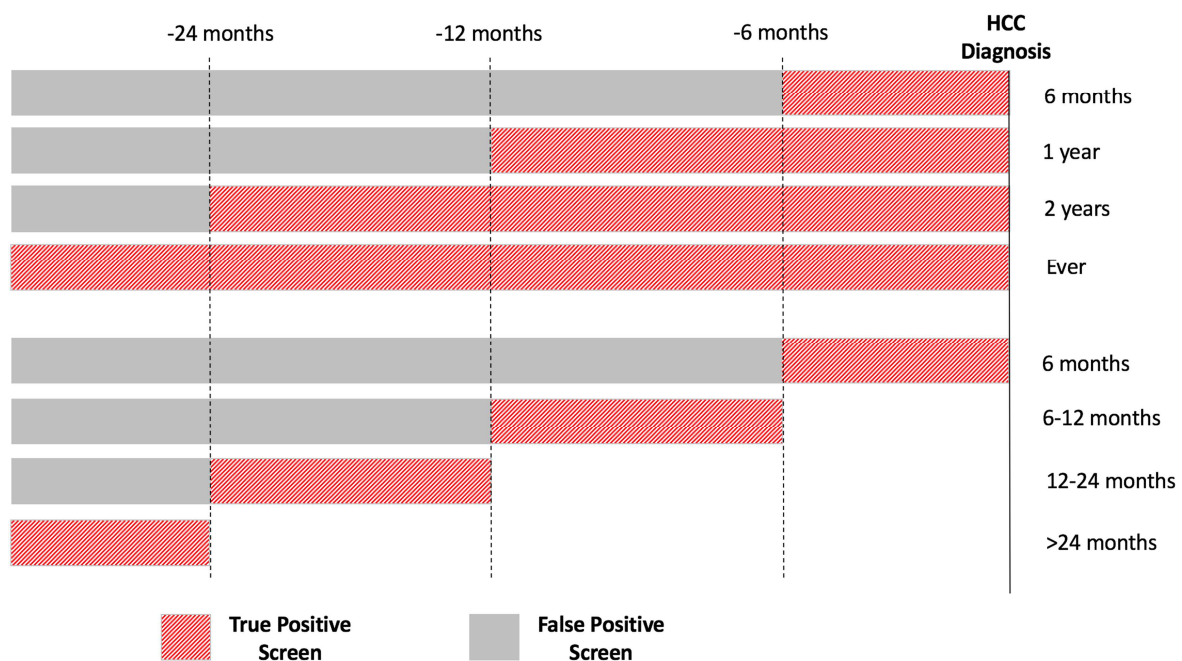

36

37

38 **Supplementary Figure 4:** Receiver operating characteristic (ROC) curves within T=6 months  
39 prior to HCC diagnosis.

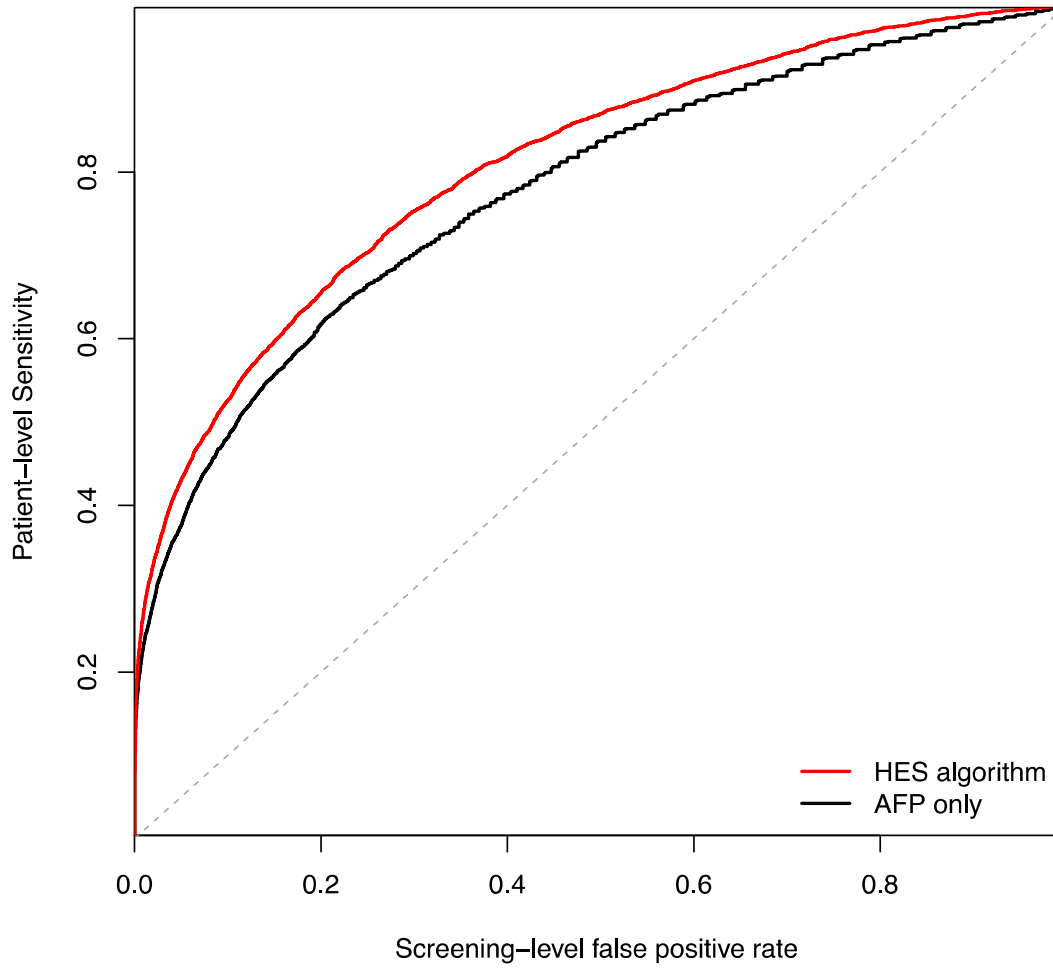

40

41

42 **Supplementary Figure 5:** Receiver operating characteristic (ROC) curves within T=12 months  
43 prior to HCC diagnosis.

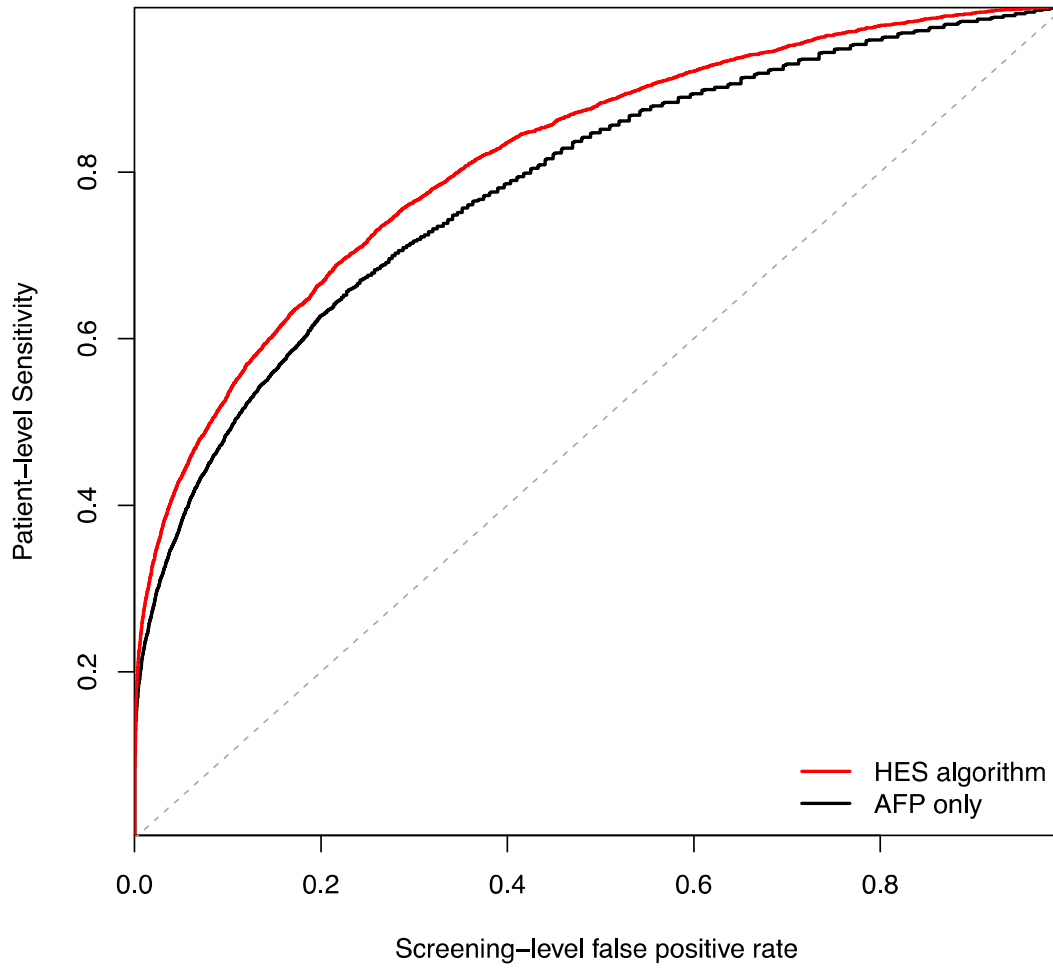

44  
45  
46

47 **Supplementary Figure 6:** Receiver operating characteristic (ROC) curves within T=24 months  
48 prior to HCC diagnosis.

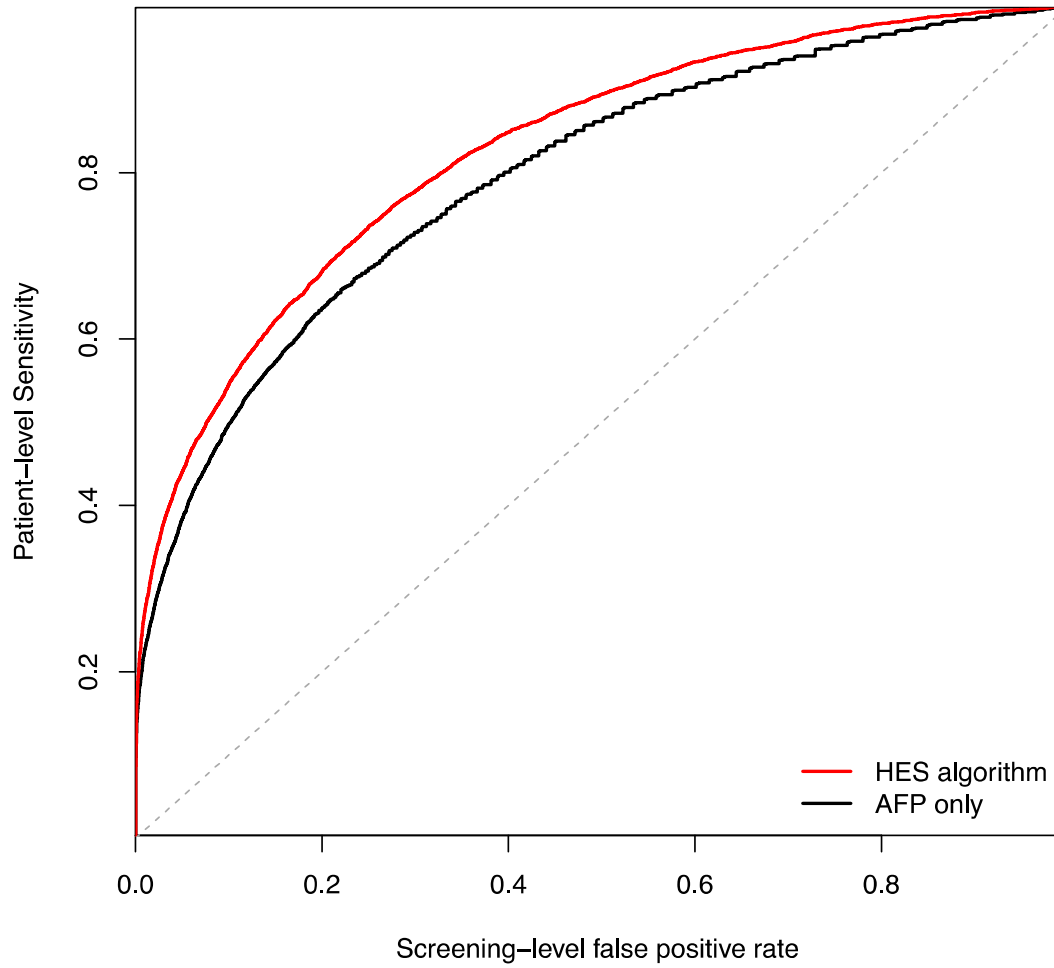

49

50



51 **Supplementary Figure 7:** Receiver operating characteristic (ROC) curves any time prior to HCC  
52 diagnosis.

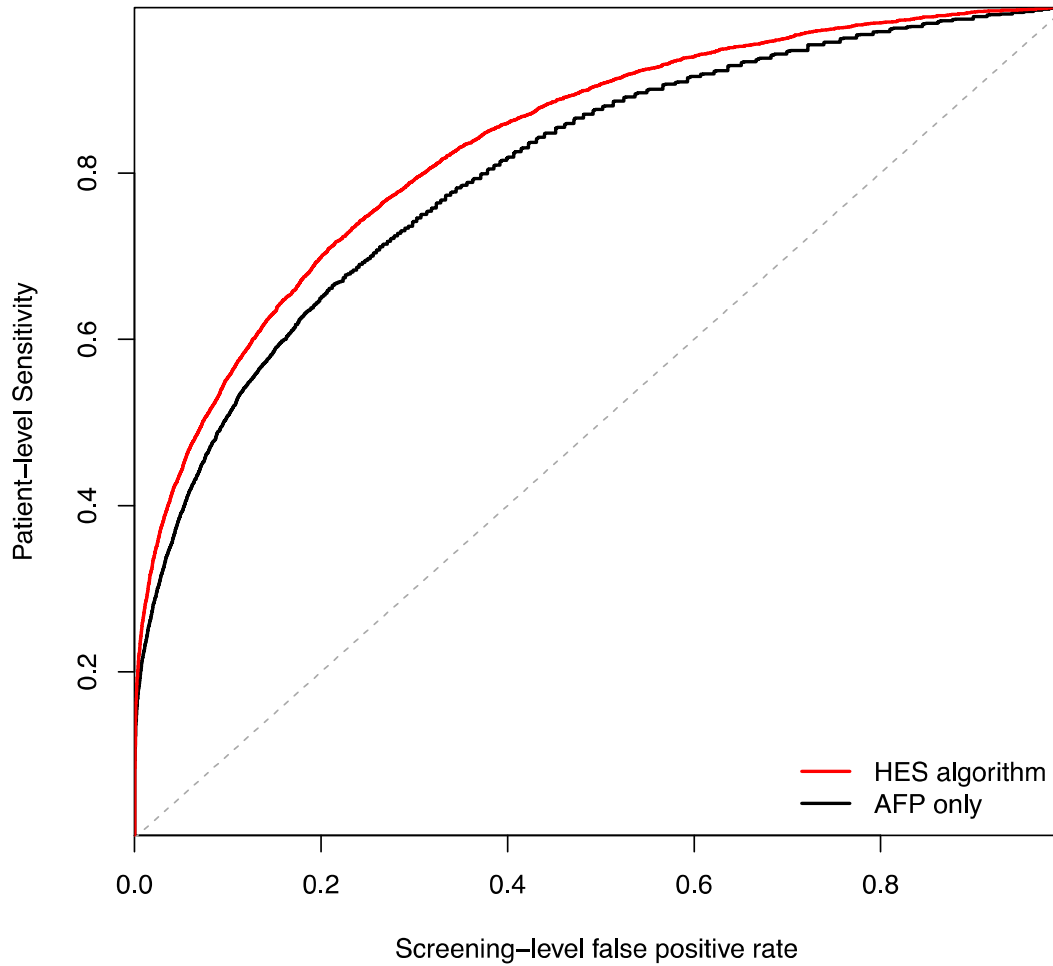

53

54 **Supplementary Table 2:** Alternative definition of HCC diagnosis time frame

| Patient-level sensitivity corresponding to 10% screening-level false positive rate | 4,804 HCC cases; 33,627 cirrhosis controls |                                   |                                   |                                   |
|------------------------------------------------------------------------------------|--------------------------------------------|-----------------------------------|-----------------------------------|-----------------------------------|
|                                                                                    | 0-6 months                                 | 6-12 months                       | 12-24 months                      | 24-Ever                           |
| HES algorithm                                                                      | 52.56<br>(95% CI:<br>50.36-53.20)          | 36.62<br>(95% CI:<br>33.52-37.79) | 28.41<br>(95% CI:<br>26.21-28.77) | 26.06<br>(95% CI:<br>23.47-27.01) |
| AFP only                                                                           | 48.13<br>(95% CI:<br>46.48-48.62)          | 33.87<br>(95% CI:<br>31.45-35.14) | 26.40<br>(95% CI:<br>23.99-27.28) | 25.21<br>(95% CI:<br>22.08-26.30) |
| Bootstrap p-values:                                                                | <0.0005                                    | <0.0005                           | <0.0005                           | 0.095                             |

55

56

57 **Supplementary Table 3: Evaluating the HES algorithm in etiology subgroups**

| Patient-level sensitivity corresponding to 10% screening-level false positive rate | Hepatitis C only*<br>337 HCC cases; 1,888 cirrhosis controls |                                |                                |                                |
|------------------------------------------------------------------------------------|--------------------------------------------------------------|--------------------------------|--------------------------------|--------------------------------|
|                                                                                    | 6 months                                                     | 12 months                      | 24 months                      | Ever                           |
| HES algorithm                                                                      | 42.96<br>(95% CI: 35.57-48.33)                               | 42.48<br>(95% CI: 36.39-47.87) | 43.16<br>(95% CI: 36.92-48.72) | 43.32<br>(95% CI: 36.51-48.83) |
| AFP only                                                                           | 38.99<br>(95% CI: 31.90-44.19)                               | 37.26<br>(95% CI: 30.46-41.97) | 37.08<br>(95% CI: 29.47-41.69) | 38.28<br>(95% CI: 31.45-43.90) |
| Bootstrap p-values:                                                                | 0.0205                                                       | 0.0060                         | 0.0050                         | 0.0050                         |

58 Patients included in this analysis are hepatitis C positive, hepatitis B negative/unknown, have no  
59 alcoholic liver disease and no non-alcoholic fatty liver disease.

| Patient-level sensitivity corresponding to 10% screening-level false positive rate | Alcoholic liver disease only*<br>945 HCC cases; 11,294 cirrhosis controls |                                |                                |                                |
|------------------------------------------------------------------------------------|---------------------------------------------------------------------------|--------------------------------|--------------------------------|--------------------------------|
|                                                                                    | 6 months                                                                  | 12 months                      | 24 months                      | Ever                           |
| HES algorithm                                                                      | 57.54<br>(95% CI: 53.59-60.60)                                            | 57.71<br>(95% CI: 54.22-60.87) | 58.03<br>(95% CI: 54.20-60.83) | 59.33<br>(95% CI: 55.77-62.24) |
| AFP only                                                                           | 53.65<br>(95% CI: 49.70-56.56)                                            | 53.71<br>(95% CI: 50.35-56.99) | 53.99<br>(95% CI: 50.35-57.11) | 54.51<br>(95% CI: 50.94-58.08) |
| Bootstrap p-values:                                                                | <0.0005                                                                   | 0.0005                         | <0.0005                        | <0.0005                        |

60 Patients included in this analysis have alcoholic liver disease, are hepatitis C negative/unknown,  
61 hepatitis B negative/unknown, and have no non-alcoholic fatty liver disease.

| Patient-level sensitivity corresponding to 10% screening-level false positive rate | Hepatitis C or Alcoholic liver disease only*<br>3,737 HCC cases; 23,996 cirrhosis controls |                                |                                |                                |
|------------------------------------------------------------------------------------|--------------------------------------------------------------------------------------------|--------------------------------|--------------------------------|--------------------------------|
|                                                                                    | 6 months                                                                                   | 12 months                      | 24 months                      | Ever                           |
| HES algorithm                                                                      | 51.88<br>(95% CI: 49.62-52.71)                                                             | 52.39<br>(95% CI: 49.96-53.12) | 53.59<br>(95% CI: 51.78-54.23) | 54.70<br>(95% CI: 52.79-55.32) |
| AFP only                                                                           | 47.40<br>(95% CI: 45.61-48.04)                                                             | 47.93<br>(95% CI: 45.75-48.50) | 48.92<br>(95% CI: 46.88-49.54) | 50.20<br>(95% CI: 47.77-50.97) |
| Bootstrap p-values:                                                                | <0.0005                                                                                    | <0.0005                        | <0.0005                        | <0.0005                        |

62 Patients included in this analysis are either hepatitis C positive or have alcoholic liver disease, are  
63 hepatitis B negative/unknown, and no non-alcoholic fatty liver disease.
